# Supplementary material for: Effects of Heterologous tRNA Modifications on the Production of Proteins Containing Noncanonical Amino Acids
Source: PubMed Central journal article supplement (PMC5874877; doi:10.3390/bioengineering5010011), 2018-02-02
Supplement: bioengineering-05-00011-s001.pdf [file bioengineering-05-00011-s001.pdf]

Supplementary material for Heterologous tRNA modifications influence o-tRNA orthogonality and OTS efficiency by Ana Crnković, Oscar Vargas-Rodriguez, Anna Merkurjev and Dieter Söll

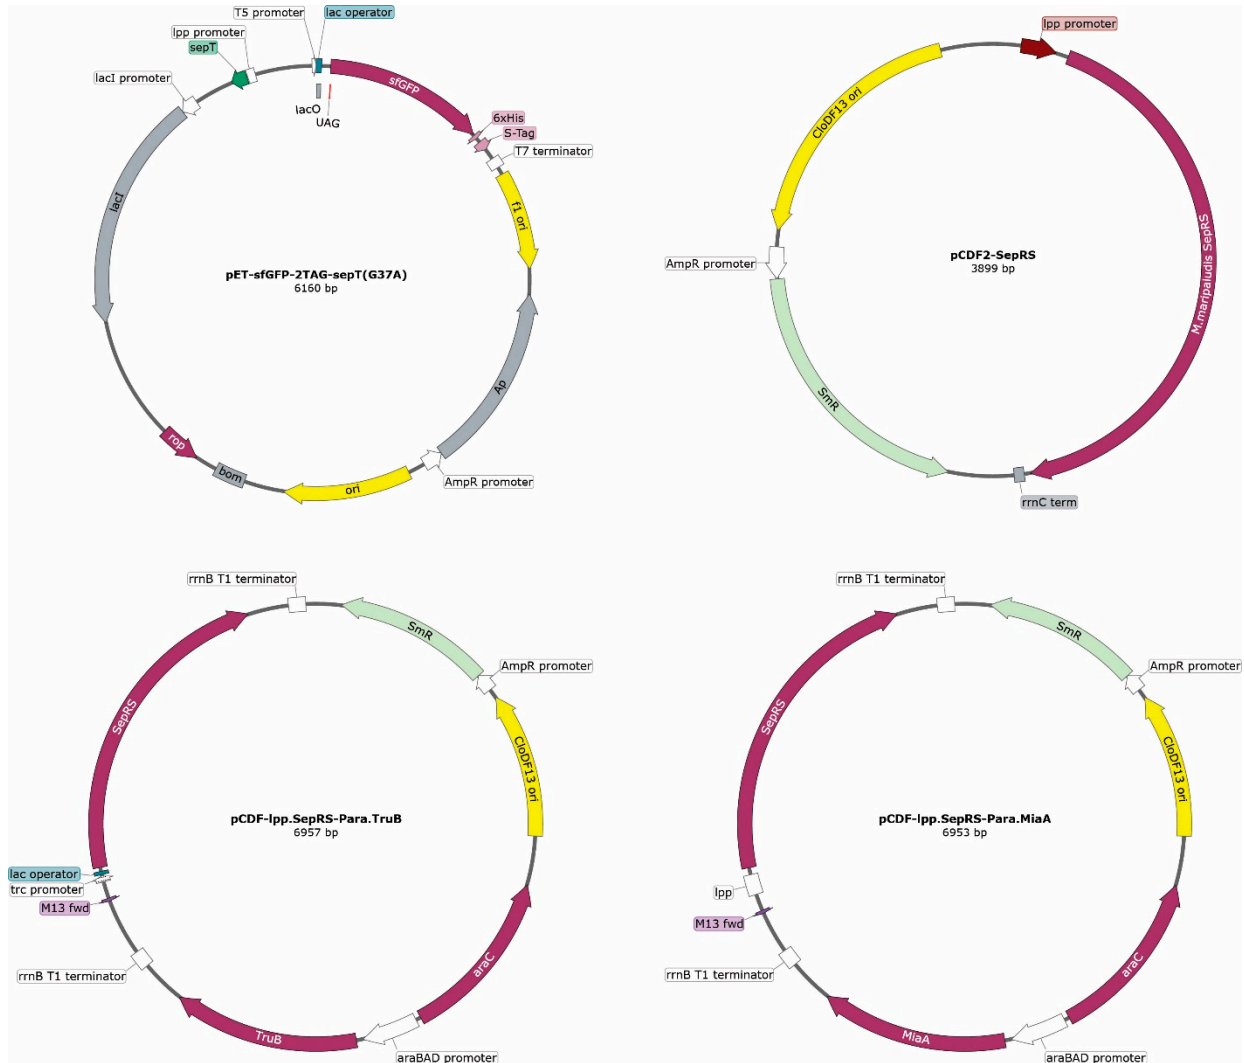

Supplementary Figure S1. Maps of plasmids used in this study.

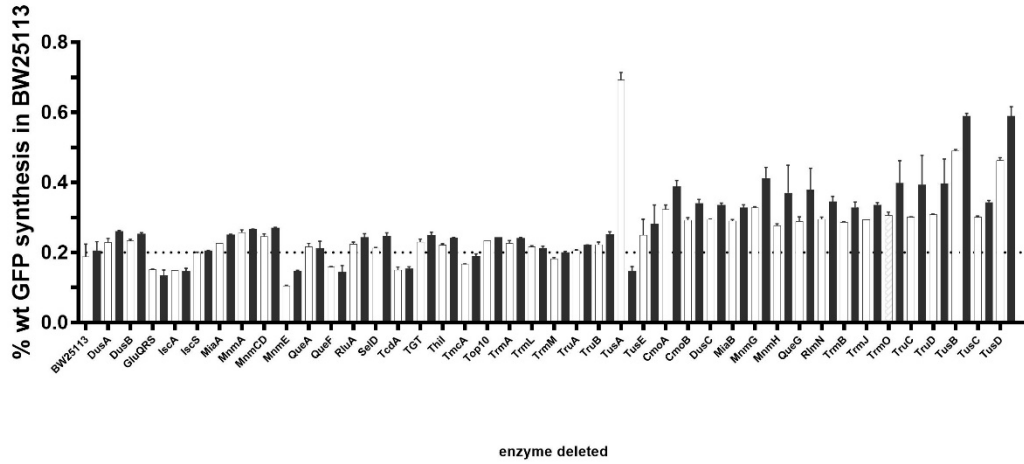

**Supplementary Figure S2.** Levels of near cognate suppression (measured as sfGFP-2TAG synthesis in the absence of tRNA<sup>Sep</sup>) in the investigated Keio deletion strains are not markedly higher than those of commonly employed strains. The levels of suppression are expressed relative to the mean wild-type GFP fluorescence obtained from the parental BW25113 strain. Cells were grown in LB medium without supplementation (empty columns) or with 5 mM Sep added (black columns). Values are mean +/- S.D., N=3.

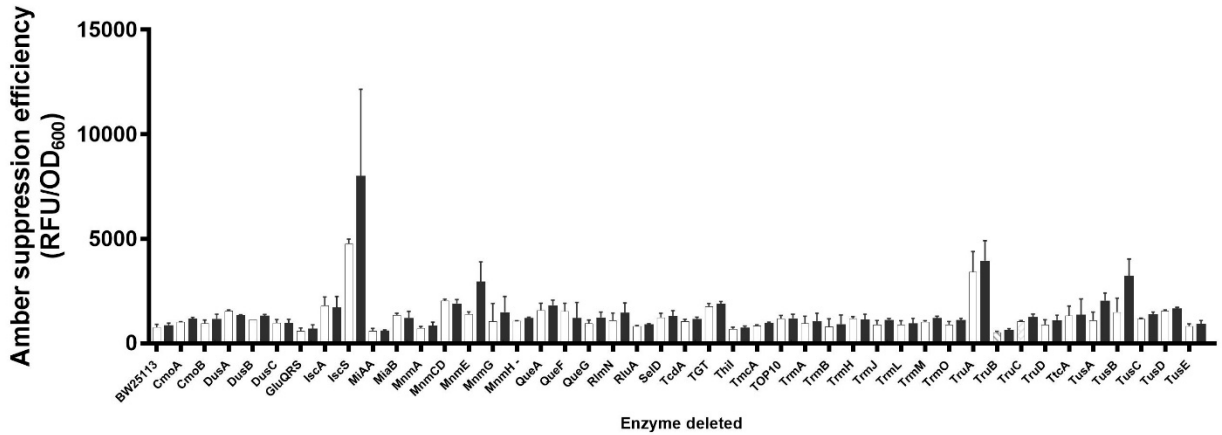

**Supplementary Figure S3.** Levels of amber codon suppression efficiency (measured as sfGFP-2TAG synthesis) in the selected Keio deletion strains in presence of Sep-OTS. Cells were grown in LB medium without supplementation (empty columns) or with 5 mM Sep added (black columns). Values are mean +/- S.D., N=4-8.

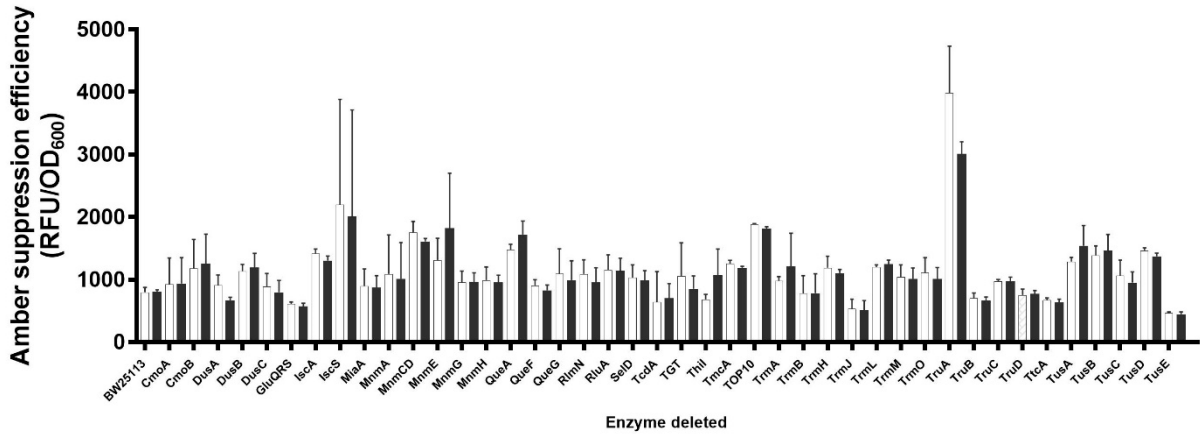

**Supplementary Figure S4.** Levels of amber codon suppression efficiency (measured as sfGFP-2TAG synthesis) in the selected Keio deletion in presence of nonsense suppressor tRNA<sup>SepCUA</sup><sup>G37A</sup>. Cells were grown in LB medium without supplementation (empty columns) or with 5 mM Sep added (black columns). Values are mean +/- S.D., N=3-6.

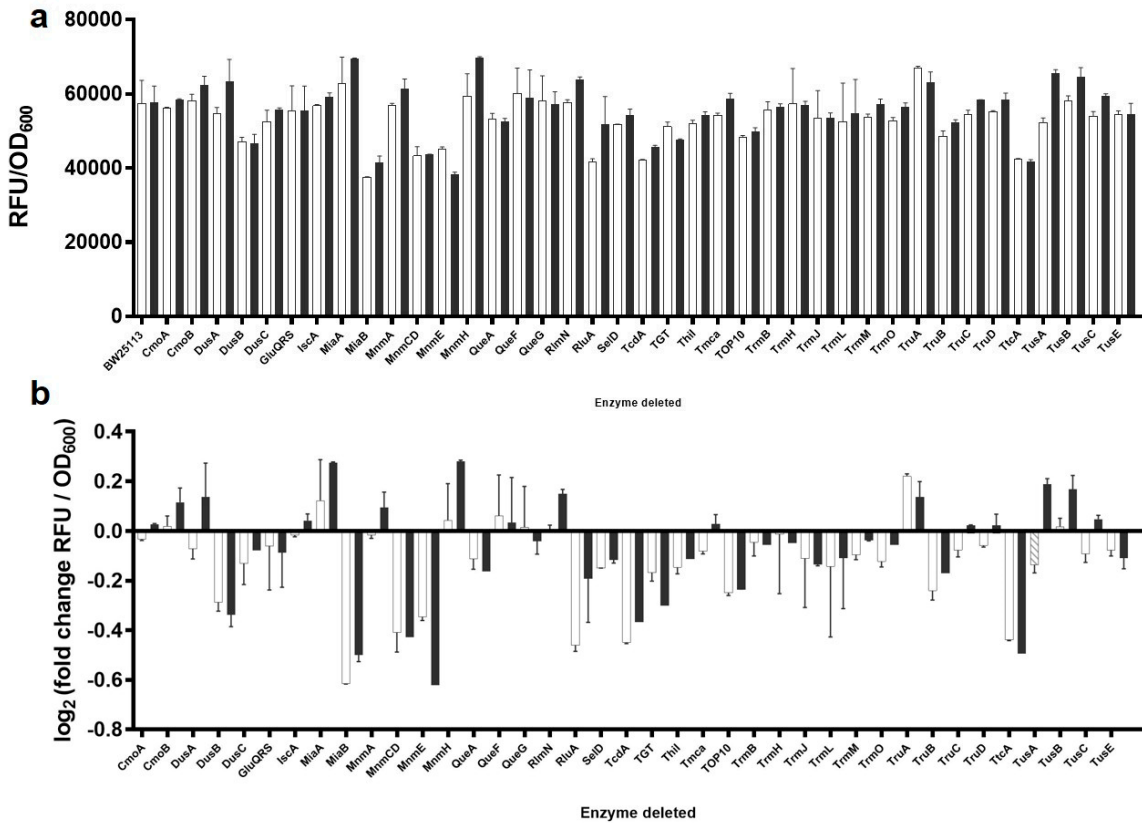

**Supplementary Figure S5.** Levels of wild type sfGFP synthesis in the tested Keio collection strains expressed in relative fluorescence units (a) and as fold change with respect to the synthesis in parental strain BW25113 (b). Cells were grown in LB medium without supplementation (empty columns) or with 5 mM Sep added (black columns). Values are mean +/- S.D., N=2-3.

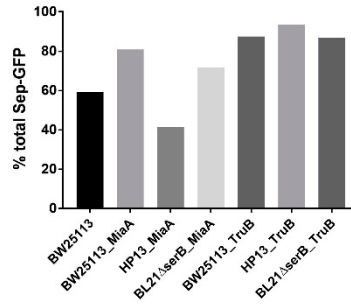

**Supplementary Figure S6.** Quantification of the shifted bands corresponding to Sep-GFP yields observed in presence of increased amounts of MiaA and TruB (Fig. 5B). Percentages of Sep-modified GFP in the corresponding isolate are shown.

**Supplementary Table S1.** List of Keio knockout strains employed in this study. Adapted according to MODOMICS database ([1], <http://modomics.genesisilico.pl>).

|        | Synonym          | Full name                                                                                                  | RNA substrate | Modification type                                     | Position in tRNA | Substrate base present in Mj <i>tRNA</i> <sup>SEP<sub>CUA</sub>G37A</sup> |
|--------|------------------|------------------------------------------------------------------------------------------------------------|---------------|-------------------------------------------------------|------------------|---------------------------------------------------------------------------|
| CmoA   | YecO             | tRNA (uridine-5-oxyacetic acid methyl ester)(34) synthase                                                  | tRNA          | cmo <sup>5</sup> U, mcmo <sup>5</sup> U               | 34               | no                                                                        |
| CmoB   | YecP             | tRNA 5-methoxyuridine(34) synthase                                                                         | tRNA          | cmo <sup>5</sup> U, mcmo <sup>5</sup> U               | 34               | no                                                                        |
| DusA   | YjbN             | tRNA dihydrouridine synthase A                                                                             | tRNA          | D                                                     | 20               |                                                                           |
| DusB   | YhdG             | tRNA dihydrouridine synthase B                                                                             | tRNA          | D                                                     | 16, 17, 20, 20a  | yes (U20)                                                                 |
| DusC   | YohI             | tRNA dihydrouridine synthase C                                                                             | tRNA          | D                                                     | 16, 17, 20, 20a  | yes (U20)                                                                 |
| GluQRS | YadB             | tRNA glutamyl-Q(34) synthetase                                                                             | tRNA          | gluQtRNA                                              | 34               | no                                                                        |
| IscA   | YfhF             | Iron-binding protein IscA                                                                                  | none          | none                                                  | none             | -                                                                         |
| IscS   | NuvC             | Cysteine desulfurase IscS subfamily                                                                        | none          | none                                                  | none             | -                                                                         |
| MiaA   | TrpX             | tRNA (adenosine(37)-N6)-dimethylallyltransferase                                                           | tRNA          | i <sup>6</sup> A                                      | 37               | yes                                                                       |
| MiaB   | YleA             | tRNA (N6-isopentenyl adenosine(37)-C2)-methylthiotransferase                                               | tRNA          | ms <sup>2</sup> i <sup>6</sup> A                      | 37               | yes                                                                       |
| MnmA   | TrmU, AsuE, YcfB | tRNA 2-thiouridine(34) synthase                                                                            | tRNA          | s <sup>2</sup> U, mnm <sup>5</sup> s <sup>2</sup> U   | 34               | no                                                                        |
| MnmCD  | TrmC, MnmC       | tRNA (5-methylaminomethyl-2-thiouridylate)-methyltransferase / FAD-dependent cmnm(5)s(2)U34 oxidoreductase | tRNA          | mnm <sup>5</sup> s <sup>2</sup> U, mnm <sup>5</sup> U | 34               | no                                                                        |

|      |                 |                                                                                                       |           |                                                                                                                          |      |          |
|------|-----------------|-------------------------------------------------------------------------------------------------------|-----------|--------------------------------------------------------------------------------------------------------------------------|------|----------|
| MnmE | ThdF,<br>TrmE   | tRNA uridine(34) 5-<br>carboxymethylaminomethyl<br>synthesis GTPase                                   | tRNA      | mnm <sup>5</sup> s <sup>2</sup> U,<br>cmnm <sup>5</sup> s <sup>2</sup> U,<br>cmnm <sup>5</sup> Um,<br>mnm <sup>5</sup> U | 34   | no       |
| MnmG | GidA,<br>TrmF   | tRNA uridine(34) 5-<br>carboxymethylaminomethyl<br>synthesis enzyme                                   | tRNA      | mnm <sup>5</sup> s <sup>2</sup> U,<br>cmnm <sup>5</sup> s <sup>2</sup> U,<br>cmnm <sup>5</sup> Um,<br>mnm <sup>5</sup> U | 34   | no       |
| MnmH | SelU,<br>YbbB   | tRNA 2-selenouridine(34)<br>synthase                                                                  | tRNA      | cmnm <sup>5</sup> ges <sup>2</sup> U,<br>mnm <sup>5</sup> se <sup>2</sup> U,<br>mnm <sup>5</sup> ges <sup>2</sup> U      | 34   | no       |
| QueA |                 | tRNA preQ1(34) S-<br>adenosylmethionine<br>ribosyltransferase-isomerase                               | tRNA      | QtRNA                                                                                                                    | 34   | no       |
| QueF | YgcD            | preQ1 synthase                                                                                        | tRNA      | QtRNA                                                                                                                    | 34   | no       |
| QueG | YjeS            | tRNA epoxyqueuosine(34)<br>reductase                                                                  | tRNA      | QtRNA                                                                                                                    | 34   | no       |
| RlmN | TrmG,<br>YfgB   | tRNA (adenosine(37)-C2)-<br>methyltransferase /<br>Ribosomal RNA large subunit<br>methyltransferase N | tRNA,rRNA | m <sup>2</sup> A                                                                                                         | 37   | yes      |
| RluA | YabO            | tRNA pseudouridine(32)<br>synthase / Ribosomal large<br>subunit pseudouridine<br>synthase A           | tRNA,rRNA | Y                                                                                                                        | 32   | no       |
| SelD | FdhB            | Selenide,water dikinase                                                                               | none      | none                                                                                                                     | none | -        |
| TcdA | YgdL,<br>CsdL   | tRNA<br>threonylcarbamoyladenine<br>dehydratase A                                                     | tRNA      | ct <sup>6</sup> A                                                                                                        | 37   | yes      |
| Tgt  | JW0396          | tRNA guanosine(34)<br>transglycosylase                                                                | tRNA      | QtRNA                                                                                                                    | 34   | no       |
| ThiI | NuvA            | tRNA 4-thiouridine(8)<br>synthase                                                                     | tRNA      | s <sup>4</sup> U                                                                                                         | 8    | yes      |
| TmcA | YpfI,<br>JW2459 | tRNA cytidine(34)<br>acetyltransferase                                                                | tRNA      | ac <sup>4</sup> C                                                                                                        | 34   | yes      |
| TrmA | RumT            | tRNA (uridine(54)-C5)-<br>methyltransferase                                                           | tRNA      | m <sup>5</sup> U                                                                                                         | 54   | yes      |
| TrmB | YggH            | tRNA (guanine(46)-N7)-<br>methyltransferase                                                           | tRNA      | m <sup>7</sup> G                                                                                                         | 46   | yes      |
| TrmH | SpoU            | tRNA (guanosine(18)-2'-O)-<br>methyltransferase                                                       | tRNA      | Gm                                                                                                                       | 18   | yes      |
| TrmJ | YfhQ,<br>JW2516 | tRNA<br>(cytidine(32)/uridine(32)-2'-<br>O)-methyltransferase                                         | tRNA      | Um, Cm                                                                                                                   | 32   | yes(C32) |
| TrmL | YibK            | tRNA (cytidine(34)-2'-O)-<br>methyltransferase                                                        | tRNA      | Cm,<br>cmnm <sup>5</sup> Um                                                                                              | 34   | yes      |
| TrmM | YfiC,<br>TrmN6  | tRNA (adenosine(37)-N6)-<br>methyltransferase                                                         | tRNA      | m <sup>6</sup> A                                                                                                         | 37   | yes      |
| TrmO | TsaA,<br>YaeB   | tRNA-methyltransferase O                                                                              | tRNA      | m <sup>6</sup> t <sup>6</sup> A                                                                                          | 37   | yes      |

|      |                                 |                                              |      |                  |            |          |
|------|---------------------------------|----------------------------------------------|------|------------------|------------|----------|
| TruA | HisT,<br>AsuC,<br>HisT,<br>LeuK | tRNA<br>pseudouridine(38,39,40)<br>synthase  | tRNA | Y                | 38, 39, 40 | yes(U39) |
| TruB | YhbA                            | tRNA pseudouridine(55)<br>synthase           | tRNA | Y                | 55         | yes      |
| TruC | YqcB                            | tRNA pseudouridine(65)<br>synthase           | tRNA | Y                | 65         | no       |
| TruD | YgbO                            | tRNA pseudouridine(13)<br>synthase           | tRNA | Y                | 13         | yes      |
| TtcA | YdaO                            | tRNA 2-thiocytidine(32)<br>synthetase        | tRNA | s <sup>2</sup> C | 32         | yes      |
| TusA | sirA,<br>yhhP                   | tRNA 2-thiouridine(34)<br>synthase           | tRNA | none             | none       | -        |
| TusB | yheL                            | tRNA 2-thiouridine(34)<br>synthase           | tRNA | none             | none       | -        |
| TusC | yheM                            | tRNA 2-thiouridine(34)<br>synthase           | tRNA | none             | none       | -        |
| TusD | yheN                            | tRNA 2-thiouridine(34)<br>synthase           | tRNA | none             | none       | -        |
| TusE | yccK                            | tRNA 2-thiouridine<br>synthesizing protein E | tRNA | none             | none       | -        |

**Supplementary Table S2. Plasmids used in this study.**

| Name                                 | Description                                                                                                                                                                                                                            | Antibiotic<br>resistance | * Source   |
|--------------------------------------|----------------------------------------------------------------------------------------------------------------------------------------------------------------------------------------------------------------------------------------|--------------------------|------------|
| pET-sfGFP-2TAG -sepT <sup>a</sup>    | pET-Duet1 containing the gene encoding sfGFP with S2TAG mutation and <i>sepT</i> encoding amber suppressor derived from <i>Methanocaldococcus jannaschii</i> tRNA <sup>Cys</sup>                                                       | Amp                      | This study |
| pET-sfGFP-2TAG                       | identical to pET-sfGFP-2TAG -sepT but without the <i>sepT</i> gene                                                                                                                                                                     |                          |            |
| pET-sfGFP                            | identical to pET-sfGFP-2TAG but with a wild type sfGFP sequence                                                                                                                                                                        |                          |            |
| pET-sfGFP-2TAG -sepT(G37A)           | pET-Duet1 containing the gene encoding sfGFP with S2TAG mutation and <i>sepT</i> with a G37A mutation                                                                                                                                  | Amp                      | This study |
| pET-sfGFP-2TAG -sepT-Trm5            | pET-Duet1 containing the gene encoding sfGFP with S2TAG mutation, <i>Methanococcus maripaludis</i> Trm5 gene under <i>lpp</i> promoter and <i>sepT</i> encoding amber suppressor derived from <i>M. jannaschii</i> tRNA <sup>Cys</sup> |                          |            |
| pET-sfGFP151TAG-sepT <sup>G37A</sup> | pET-Duet1 containing the gene encoding sfGFP with Y151TAG mutation and <i>sepT</i> gene with a G37A mutation                                                                                                                           | Amp                      | This study |
| pCDF2-SepRS                          | pCDF2 containing gene encoding SepRS <sup>b</sup>                                                                                                                                                                                      | Sp                       | This study |

|                          |                                                                                     |     |            |
|--------------------------|-------------------------------------------------------------------------------------|-----|------------|
| pCDF-lpp.SepRS-Para.MiaA | pCDF containing the gene encoding SepRS under lpp and MiaA under arabinose promoter | Sp  | This study |
| pCDF-lpp.SepRS-Para.TruB | pCDF containing the gene encoding SepRS under lpp and TruB under arabinose promoter | Amp | This study |

<sup>a</sup> In all pET-sfGFP constructs, GFP gene was placed under the control of T5, and tRNA (if present) under an lpp promoter

<sup>b</sup>Gene for SepRS was under lpp promoter

**Supplementary Table S3.** Statistical analysis of the fluorescence measurements obtained for the amber codon suppression efficiency (sfGFP-2TAG synthesis) in the selected Keio deletion strains in presence of Sep-OTS. The fluorescence measurements were calculated as a log<sub>2</sub> fold change relative to the BW25113 strain. The results of the Student's t-test are shown. Theoretical mean value is 0. Supplementation with 5 mM Sep is indicated by "+".

| Gene deleted | Mean     | Std. Deviation | Std. Error of Mean | Actual mean | Discrepancy | 95% CI of discrepancy | t, df            | P value (two tailed) | Significant (alpha=0.05)? |
|--------------|----------|----------------|--------------------|-------------|-------------|-----------------------|------------------|----------------------|---------------------------|
| cmoA         | 0.4212   | 0.01414        | 0.006325           | 0.4212      | 0.4212      | 0.4036 to 0.4387      | t=66.59<br>df=4  | <0.0001              | Yes                       |
| cmoA +       | 0.6328   | 0.06042        | 0.03488            | 0.6328      | 0.6328      | 0.4828 to 0.7829      | t=18.14<br>df=2  | 0.003                | Yes                       |
| cmoB         | 0.2968   | 0.2406         | 0.1076             | 0.2968      | 0.2968      | -0.001901 to 0.5956   | t=2.759<br>df=4  | 0.0509               | No                        |
| cmoB +       | 0.5878   | 0.2933         | 0.1312             | 0.5878      | 0.5878      | 0.2237 to 0.952       | t=4.482<br>df=4  | 0.011                | Yes                       |
| dusA         | 1.025    | 0.02839        | 0.01639            | 1.025       | 1.025       | 0.9545 to 1.096       | t=62.53<br>df=2  | 0.0003               | Yes                       |
| dusA +       | 0.8149   | 0.0113         | 0.006525           | 0.8149      | 0.8149      | 0.7869 to 0.843       | t=124.9<br>df=2  | <0.0001              | Yes                       |
| dusB         | 0.5722   | 0.001129       | 0.000652           | 0.5722      | 0.5722      | 0.5694 to 0.575       | t=877.8<br>df=2  | <0.0001              | Yes                       |
| dusB +       | 0.7879   | 0.04469        | 0.0258             | 0.7879      | 0.7879      | 0.6769 to 0.8989      | t=30.54<br>df=2  | 0.0011               | Yes                       |
| dusC         | 0.329    | 0.2333         | 0.1043             | 0.329       | 0.329       | 0.03931 to 0.6187     | t=3.153<br>df=4  | 0.0344               | Yes                       |
| dusC +       | 0.3225   | 0.2566         | 0.1148             | 0.3225      | 0.3225      | 0.003804 to 0.6411    | t=2.81<br>df=4   | 0.0483               | Yes                       |
| qluQRS       | -0.3944  | 0.3295         | 0.1647             | -0.3944     | -0.3944     | -0.9188 to 0.1299     | t=2.394<br>df=3  | 0.0964               | No                        |
| gluQRS +     | -0.1599  | 0.3728         | 0.1864             | -0.1599     | -0.1599     | -0.7532 to 0.4333     | t=0.8579<br>df=3 | 0.454                | No                        |
| iscA         | 1.209    | 0.3327         | 0.1664             | 1.209       | 1.209       | 0.6791 to 1.738       | t=7.265<br>df=3  | 0.0054               | Yes                       |
| iscA +       | 1.111    | 0.4526         | 0.2263             | 1.111       | 1.111       | 0.3913 to 1.832       | t=4.912<br>df=3  | 0.0162               | Yes                       |
| iscS         | 2.641    | 0.06597        | 0.02693            | 2.641       | 2.641       | 2.572 to 2.71         | t=98.06<br>df=5  | <0.0001              | Yes                       |
| iscS +       | 3.249    | 0.682          | 0.2784             | 3.249       | 3.249       | 2.533 to 3.965        | t=11.67<br>df=5  | <0.0001              | Yes                       |
| miAA         | -0.3791  | 0.2525         | 0.1262             | -0.3791     | -0.3791     | -0.7808 to 0.02259    | t=3.003<br>df=3  | 0.0575               | No                        |
| miaA +       | -0.3474  | 0.0793         | 0.03965            | -0.3474     | -0.3474     | -0.4736 to -0.2213    | t=8.762<br>df=3  | 0.0031               | Yes                       |
| miaB         | 0.8201   | 0.08743        | 0.0391             | 0.8201      | 0.8201      | 0.7115 to 0.9286      | t=20.97<br>df=4  | <0.0001              | Yes                       |
| miaB +       | 0.6187   | 0.4018         | 0.1797             | 0.6187      | 0.6187      | 0.1198 to 1.118       | t=3.443<br>df=4  | 0.0262               | Yes                       |
| mnmA         | -0.09548 | 0.1624         | 0.08121            | -0.09548    | -0.09548    | -0.3539 to 0.163      | t=1.176<br>df=3  | 0.3245               | No                        |

| Gene deleted | Mean     | Std. Deviation | Std. Error of Mean | Actual mean | Discrepancy | 95% CI of discrepancy | t, df             | P value (two tailed) | Significant (alpha=0.05)? |
|--------------|----------|----------------|--------------------|-------------|-------------|-----------------------|-------------------|----------------------|---------------------------|
| mnmA +       | 0.105    | 0.3079         | 0.1539             | 0.105       | 0.105       | -0.3849 to 0.5949     | t=0.6823<br>df=3  | 0.544                | No                        |
| mnmC D       | 1.415    | 0.04914        | 0.02457            | 1.415       | 1.415       | 1.337 to 1.494        | t=57.6<br>df=3    | <0.0001              | Yes                       |
| mnmC D +     | 1.316    | 0.1308         | 0.0654             | 1.316       | 1.316       | 1.108 to 1.524        | t=20.12<br>df=3   | 0.0003               | Yes                       |
| mnmE         | 0.8683   | 0.1062         | 0.04748            | 0.8683      | 0.8683      | 0.7365 to 1           | t=18.29<br>df=4   | <0.0001              | Yes                       |
| mnmE +       | 1.887    | 0.4985         | 0.2229             | 1.887       | 1.887       | 1.268 to 2.506        | t=8.466<br>df=4   | 0.0011               | Yes                       |
| mnmG 1       | 0.02361  | 1.238          | 0.5536             | 0.02361     | 0.02361     | -1.513 to 1.561       | t=0.04264<br>df=4 | 0.968                | No                        |
| mnmG +       | 0.7424   | 1.016          | 0.4545             | 0.7424      | 0.7424      | -0.5194 to 2.004      | t=1.634<br>df=4   | 0.1777               | No                        |
| mnmH         | 0.4887   | 0.01468        | 0.008477           | 0.4887      | 0.4887      | 0.4522 to 0.5252      | t=57.65<br>df=2   | 0.0003               | Yes                       |
| mnmH +       | 0.6717   | 0.02601        | 0.01502            | 0.6717      | 0.6717      | 0.6071 to 0.7363      | t=44.73<br>df=2   | 0.0005               | Yes                       |
| queA         | 1.033    | 0.2964         | 0.1482             | 1.033       | 1.033       | 0.5608 to 1.504       | t=6.966<br>df=3   | 0.0061               | Yes                       |
| queA +       | 1.231    | 0.2062         | 0.1031             | 1.231       | 1.231       | 0.9033 to 1.56        | t=11.94<br>df=3   | 0.0013               | Yes                       |
| queF         | 0.9549   | 0.3596         | 0.1608             | 0.9549      | 0.9549      | 0.5084 to 1.402       | t=5.937<br>df=4   | 0.004                | Yes                       |
| queF +       | 0.3354   | 1.144          | 0.5115             | 0.3354      | 0.3354      | -1.085 to 1.756       | t=0.6557<br>df=4  | 0.5478               | No                        |
| queG         | 0.2985   | 0.2533         | 0.1266             | 0.2985      | 0.2985      | -0.1045 to 0.7015     | t=2.357<br>df=3   | 0.0996               | No                        |
| queG +       | 0.6772   | 0.2897         | 0.1449             | 0.6772      | 0.6772      | 0.2162 to 1.138       | t=4.675<br>df=3   | 0.0185               | Yes                       |
| rlmN         | 0.4471   | 0.4562         | 0.204              | 0.4471      | 0.4471      | -0.1193 to 1.014      | t=2.192<br>df=4   | 0.0935               | No                        |
| rlmN +       | 0.874    | 0.4922         | 0.2201             | 0.874       | 0.874       | 0.2629 to 1.485       | t=3.971<br>df=4   | 0.0165               | Yes                       |
| rluA         | 0.1163   | 0.03216        | 0.01608            | 0.1163      | 0.1163      | 0.06512 to 0.1675     | t=7.231<br>df=3   | 0.0055               | Yes                       |
| rluA +       | 0.2611   | 0.03212        | 0.01606            | 0.2611      | 0.2611      | 0.21 to 0.3122        | t=16.26<br>df=3   | 0.0005               | Yes                       |
| selD         | 0.6873   | 0.2211         | 0.1106             | 0.6873      | 0.6873      | 0.3354 to 1.039       | t=6.217<br>df=3   | 0.0084               | Yes                       |
| selD +       | 0.7591   | 0.2774         | 0.1387             | 0.7591      | 0.7591      | 0.3176 to 1.201       | t=5.472<br>df=3   | 0.012                | Yes                       |
| tcdA         | 0.4659   | 0.124          | 0.062              | 0.4659      | 0.4659      | 0.2686 to 0.6632      | t=7.514<br>df=3   | 0.0049               | Yes                       |
| tcdA +       | 0.617    | 0.08613        | 0.04307            | 0.617       | 0.617       | 0.48 to 0.7541        | t=14.33<br>df=3   | 0.0007               | Yes                       |
| tgt          | 1.205    | 0.1109         | 0.05546            | 1.205       | 1.205       | 1.028 to 1.381        | t=21.72<br>df=3   | 0.0002               | Yes                       |
| tgt +        | 1.309    | 0.0794         | 0.0397             | 1.309       | 1.309       | 1.183 to 1.436        | t=32.99<br>df=3   | <0.0001              | Yes                       |
| thiI         | -0.1781  | 0.1869         | 0.09343            | -0.1781     | -0.1781     | -0.4754 to 0.1193     | t=1.906<br>df=3   | 0.1527               | No                        |
| thiI +       | -0.04168 | 0.1574         | 0.0787             | -0.04168    | -0.04168    | -0.2921 to 0.2088     | t=0.5296<br>df=3  | 0.6331               | No                        |
| tmcA         | 0.1532   | 0.04364        | 0.02182            | 0.1532      | 0.1532      | 0.08379 to 0.2227     | t=7.022<br>df=3   | 0.0059               | Yes                       |
| tmcA +       | 0.3442   | 0.05134        | 0.02567            | 0.3442      | 0.3442      | 0.2625 to 0.4259      | t=13.41<br>df=3   | 0.0009               | Yes                       |
| TOP10        | 0.6162   | 0.173          | 0.0865             | 0.6162      | 0.6162      | 0.3409 to 0.8915      | t=7.124<br>df=3   | 0.0057               | Yes                       |
| TOP10 +      | 0.625    | 0.23           | 0.115              | 0.625       | 0.625       | 0.259 to 0.9911       | t=5.434<br>df=3   | 0.0122               | Yes                       |



| Gene deleted | Mean     | Std. Deviation | Std. Error of Mean | Actual mean | Discrepancy | 95% CI of discrepancy | t, df            | P value (two tailed) | Significant (alpha=0.05)? |
|--------------|----------|----------------|--------------------|-------------|-------------|-----------------------|------------------|----------------------|---------------------------|
| trmA         | 0.2308   | 0.5573         | 0.2786             | 0.2308      | 0.2308      | -0.656 to 1.117       | t=0.8282<br>df=3 | 0.4683               | No                        |
| trmA +       | 0.393    | 0.5327         | 0.2663             | 0.393       | 0.393       | -0.4546 to 1.241      | t=1.476<br>df=3  | 0.2365               | No                        |
| trmB         | -0.07429 | 0.724          | 0.362              | -0.07429    | -0.07429    | -1.226 to 1.078       | t=0.2052<br>df=3 | 0.8505               | No                        |
| trmB +       | 0.1082   | 0.7623         | 0.3811             | 0.1082      | 0.1082      | -1.105 to 1.321       | t=0.284<br>df=3  | 0.7949               | No                        |
| trmH         | 0.6263   | 0.1095         | 0.04895            | 0.6263      | 0.6263      | 0.4904 to 0.7622      | t=12.79<br>df=4  | 0.0002               | Yes                       |
| trmH +       | 0.5318   | 0.3477         | 0.1555             | 0.5318      | 0.5318      | 0.1 to 0.9635         | t=3.42<br>df=4   | 0.0268               | Yes                       |
| trmJ         | 0.1963   | 0.3267         | 0.1633             | 0.1963      | 0.1963      | -0.3235 to 0.7161     | t=1.202<br>df=3  | 0.3156               | No                        |
| trmJ +       | 0.5501   | 0.08019        | 0.04009            | 0.5501      | 0.5501      | 0.4225 to 0.6777      | t=13.72<br>df=3  | 0.0008               | Yes                       |
| trmL         | 0.1738   | 0.3256         | 0.1628             | 0.1738      | 0.1738      | -0.3443 to 0.692      | t=1.068<br>df=3  | 0.364                | No                        |
| trmL +       | 0.2891   | 0.3565         | 0.1783             | 0.2891      | 0.2891      | -0.2782 to 0.8564     | t=1.622<br>df=3  | 0.2033               | No                        |
| trmM         | 0.4305   | 0.06643        | 0.02971            | 0.4305      | 0.4305      | 0.348 to 0.513        | t=14.49<br>df=4  | 0.0001               | Yes                       |
| trmM +       | 0.656    | 0.1057         | 0.04729            | 0.656       | 0.656       | 0.5246 to 0.7873      | t=13.87<br>df=4  | 0.0002               | Yes                       |
| trmO         | 0.2074   | 0.2415         | 0.108              | 0.2074      | 0.2074      | -0.09253 to 0.5073    | t=1.92<br>df=4   | 0.1273               | No                        |
| trmO +       | 0.5309   | 0.1116         | 0.04993            | 0.5309      | 0.5309      | 0.3923 to 0.6695      | t=10.63<br>df=4  | 0.0004               | Yes                       |
| truA         | 2.108    | 0.4166         | 0.1473             | 2.108       | 2.108       | 1.759 to 2.456        | t=14.31<br>df=7  | <0.0001              | Yes                       |
| truA +       | 2.333    | 0.3483         | 0.1232             | 2.333       | 2.333       | 2.042 to 2.625        | t=18.95<br>df=7  | <0.0001              | Yes                       |
| truB         | -0.562   | 0.1208         | 0.0604             | -0.562      | -0.562      | -0.7542 to -0.3698    | t=9.305<br>df=3  | 0.0026               | Yes                       |
| truB +       | -0.2878  | 0.1469         | 0.06571            | -0.2878     | -0.2878     | -0.4702 to -0.1053    | t=4.379<br>df=4  | 0.0119               | Yes                       |
| truC         | 0.46     | 0.04539        | 0.02269            | 0.46        | 0.46        | 0.3878 to 0.5322      | t=20.27<br>df=3  | 0.0003               | Yes                       |
| truC +       | 0.6966   | 0.1795         | 0.08974            | 0.6966      | 0.6966      | 0.411 to 0.9823       | t=7.763<br>df=3  | 0.0044               | Yes                       |
| truD         | 0.1721   | 0.3759         | 0.1681             | 0.1721      | 0.1721      | -0.2946 to 0.6388     | t=1.024<br>df=4  | 0.3638               | No                        |
| truD +       | 0.5062   | 0.2874         | 0.1285             | 0.5062      | 0.5062      | 0.1494 to 0.863       | t=3.939<br>df=4  | 0.017                | Yes                       |
| ttaA         | 0.7246   | 0.4769         | 0.2133             | 0.7246      | 0.7246      | 0.1324 to 1.317       | t=3.397<br>df=4  | 0.0274               | Yes                       |
| ttaA +       | 0.6751   | 0.7312         | 0.327              | 0.6751      | 0.6751      | -0.2327 to 1.583      | t=2.065<br>df=4  | 0.1079               | No                        |
| tusA         | 0.4458   | 0.524          | 0.2139             | 0.4458      | 0.4458      | -0.104 to 0.9957      | t=2.084<br>df=5  | 0.0916               | No                        |
| tusA +       | 1.394    | 0.2742         | 0.1119             | 1.394       | 1.394       | 1.107 to 1.682        | t=12.46<br>df=5  | <0.0001              | Yes                       |
| tusB         | 0.7278   | 1.057          | 0.3997             | 0.7278      | 0.7278      | -0.2502 to 1.706      | t=1.821<br>df=6  | 0.1185               | No                        |
| tusB +       | 2.039    | 0.3713         | 0.1516             | 2.039       | 2.039       | 1.649 to 2.429        | t=13.45<br>df=5  | <0.0001              | Yes                       |
| tusC         | 0.6023   | 0.05913        | 0.02957            | 0.6023      | 0.6023      | 0.5082 to 0.6964      | t=20.37<br>df=3  | 0.0003               | Yes                       |
| tusC +       | 0.859    | 0.1088         | 0.05439            | 0.859       | 0.859       | 0.6859 to 1.032       | t=15.79<br>df=3  | 0.0006               | Yes                       |
| tusD         | 1.015    | 0.04516        | 0.02019            | 1.015       | 1.015       | 0.9588 to 1.071       | t=50.26<br>df=4  | <0.0001              | Yes                       |

| Gene deleted | Mean    | Std. Deviation | Std. Error of Mean | Actual mean | Discrepancy | 95% CI of discrepancy | t, df         | P value (two tailed) | Significant (alpha=0.05)? |
|--------------|---------|----------------|--------------------|-------------|-------------|-----------------------|---------------|----------------------|---------------------------|
| tusD +       | 1.12    | 0.05405        | 0.02417            | 1.12        | 1.12        | 1.053 to 1.187        | t=46.32 df=4  | <0.0001              | Yes                       |
| tusE         | 0.08858 | 0.1851         | 0.09257            | 0.08858     | 0.08858     | -0.206 to 0.3832      | t=0.9568 df=3 | 0.4092               | No                        |
| tusE +       | 0.2664  | 0.2414         | 0.1207             | 0.2664      | 0.2664      | -0.1178 to 0.6506     | t=2.207 df=3  | 0.1144               | No                        |

**Supplementary Table S4.** Statistical analysis of the fluorescence measurements obtained for the amber codon suppression efficiency (sfGFP-2TAG synthesis) in the selected Keio deletion strains in presence of tRNA<sup>Sep</sup> only. The fluorescence measurements were calculated as a log<sub>2</sub> fold change relative to the BW25113 strain. The results of the Student's t-test are shown. Theoretical mean value is 0. Supplementation with 5 mM Sep is indicated by "+".

| Gene deleted | Mean     | Std. Deviation | Std. Error of Mean | Actual mean | Discrepancy | 95% CI of discrepancy | t, df         | P value (two tailed) | Significant (alpha=0.05)? |
|--------------|----------|----------------|--------------------|-------------|-------------|-----------------------|---------------|----------------------|---------------------------|
| cmoA         | 0.0906   | 0.698          | 0.349              | 0.0906      | 0.0906      | -1.02 to 1.201        | t=0.2596 df=3 | 0.812                | No                        |
| cmoA +       | 0.1184   | 0.6709         | 0.3354             | 0.1184      | 0.1184      | -0.9491 to 1.186      | t=0.3529 df=3 | 0.7475               | No                        |
| cmoB         | 0.4771   | 0.5895         | 0.2948             | 0.4771      | 0.4771      | -0.4609 to 1.415      | t=1.619 df=3  | 0.2039               | No                        |
| cmoB +       | 0.5727   | 0.562          | 0.281              | 0.5727      | 0.5727      | -0.3215 to 1.467      | t=2.038 df=3  | 0.1343               | No                        |
| dusA         | 0.1713   | 0.2544         | 0.1272             | 0.1713      | 0.1713      | -0.2336 to 0.5762     | t=1.347 df=3  | 0.2708               | No                        |
| dusA +       | -0.2667  | 0.1154         | 0.05769            | -0.2667     | -0.2667     | -0.4503 to -0.0831    | t=4.623 df=3  | 0.0191               | Yes                       |
| dusB         | 0.5075   | 0.128          | 0.064              | 0.5075      | 0.5075      | 0.3038 to 0.7112      | t=7.93 df=3   | 0.0042               | Yes                       |
| dusB +       | 0.5607   | 0.2821         | 0.1411             | 0.5607      | 0.5607      | 0.1118 to 1.01        | t=3.975 df=3  | 0.0285               | Yes                       |
| dusC         | 0.124    | 0.3548         | 0.1774             | 0.124       | 0.124       | -0.4406 to 0.6885     | t=0.6989 df=3 | 0.5349               | No                        |
| dusC +       | -0.03174 | 0.341          | 0.1705             | -0.03174    | -0.03174    | -0.5744 to 0.5109     | t=0.1862 df=3 | 0.8642               | No                        |
| gluQRS       | -0.3779  | 0.0566         | 0.03268            | -0.3779     | -0.3779     | -0.5185 to -0.2373    | t=11.57 df=2  | 0.0074               | Yes                       |
| gluQRS +     | -0.4843  | 0.09237        | 0.05333            | -0.4843     | -0.4843     | -0.7137 to -0.2548    | t=9.081 df=2  | 0.0119               | Yes                       |
| iscA         | 0.8254   | 0.04885        | 0.0282             | 0.8254      | 0.8254      | 0.7041 to 0.9468      | t=29.27 df=2  | 0.0012               | Yes                       |
| iscA +       | 0.7044   | 0.05809        | 0.03354            | 0.7044      | 0.7044      | 0.5601 to 0.8487      | t=21 df=2     | 0.0023               | Yes                       |
| iscS         | 0.9832   | 1.504          | 0.7519             | 0.9832      | 0.9832      | -1.41 to 3.376        | t=1.308 df=3  | 0.2822               | No                        |
| iscS +       | 0.7606   | 1.625          | 0.8123             | 0.7606      | 0.7606      | -1.825 to 3.346       | t=0.9363 df=3 | 0.4182               | No                        |
| miAA         | 0.1147   | 0.4237         | 0.173              | 0.1147      | 0.1147      | -0.3299 to 0.5594     | t=0.6634 df=5 | 0.5364               | No                        |
| miA +        | 0.1088   | 0.2987         | 0.1219             | 0.1088      | 0.1088      | -0.2046 to 0.4223     | t=0.8925 df=5 | 0.413                | No                        |
| miAB         | 0.3088   | 0.01587        | 0.009162           | 0.3088      | 0.3088      | 0.2693 to 0.3482      | t=33.7 df=2   | 0.0009               | Yes                       |
| miAB +       | 0.2149   | 0.01236        | 0.007138           | 0.2149      | 0.2149      | 0.1842 to 0.2456      | t=30.1 df=2   | 0.0011               | Yes                       |
| mnmA         | 0.2491   | 0.8941         | 0.4471             | 0.2491      | 0.2491      | -1.174 to 1.672       | t=0.5572 df=3 | 0.6163               | No                        |
| mnmA +       | 0.1474   | 0.8971         | 0.4485             | 0.1474      | 0.1474      | -1.28 to 1.575        | t=0.3287 df=3 | 0.764                | No                        |
| mnmCD        | 1.134    | 0.1347         | 0.06733            | 1.134       | 1.134       | 0.92 to 1.349         | t=16.85 df=3  | 0.0005               | Yes                       |
| mnmCD +      | 1.013    | 0.04154        | 0.02077            | 1.013       | 1.013       | 0.9466 to 1.079       | t=48.76 df=3  | <0.0001              | Yes                       |
| mnmE         | 0.672    | 0.4086         | 0.1827             | 0.672       | 0.672       | 0.1647 to 1.179       | t=3.678 df=4  | 0.0212               | Yes                       |
| mnmE +       | 1.014    | 0.8384         | 0.3749             | 1.014       | 1.014       | -0.02653 to 2.056     | t=2.706 df=4  | 0.0538               | No                        |
| mnmG         | 0.2405   | 0.1924         | 0.1111             | 0.2405      | 0.2405      | -0.2375 to 0.7185     | t=2.164 df=2  | 0.1629               | No                        |
| mnmG +       | 0.2252   | 0.1695         | 0.09787            | 0.2252      | 0.2252      | -0.1959 to 0.6463     | t=2.301 df=2  | 0.1481               | No                        |
| mnmH         | 0.2885   | 0.3093         | 0.1547             | 0.2885      | 0.2885      | -0.2038 to 0.7807     | t=1.865 df=3  | 0.159                | No                        |

| Gene deleted | Mean    | Std. Deviation | Std. Error of Mean | Actual mean | Discrepancy | 95% CI of discrepancy | t, df         | P value (two tailed) | Significant (alpha=0.05)? |
|--------------|---------|----------------|--------------------|-------------|-------------|-----------------------|---------------|----------------------|---------------------------|
| mnmH +       | 0.2525  | 0.1761         | 0.08803            | 0.2525      | 0.2525      | -0.02769 to 0.5326    | t=2.868 df=3  | 0.0642               | No                        |
| queA         | 0.8851  | 0.08516        | 0.04258            | 0.8851      | 0.8851      | 0.7496 to 1.021       | t=20.79 df=3  | 0.0002               | Yes                       |
| queA +       | 1.096   | 0.1821         | 0.09106            | 1.096       | 1.096       | 0.8066 to 1.386       | t=12.04 df=3  | 0.0012               | Yes                       |
| queF         | 0.176   | 0.1473         | 0.07363            | 0.176       | 0.176       | -0.05831 to 0.4103    | t=2.391 df=3  | 0.0967               | No                        |
| queF +       | 0.05339 | 0.1429         | 0.07146            | 0.05339     | 0.05339     | -0.174 to 0.2808      | t=0.7471 df=3 | 0.5092               | No                        |
| queG         | 0.3834  | 0.5552         | 0.2776             | 0.3834      | 0.3834      | -0.5001 to 1.267      | t=1.381 df=3  | 0.2612               | No                        |
| queG +       | 0.252   | 0.4748         | 0.2374             | 0.252       | 0.252       | -0.5035 to 1.007      | t=1.061 df=3  | 0.3664               | No                        |
| rlmN         | 0.4231  | 0.3082         | 0.1541             | 0.4231      | 0.4231      | -0.06726 to 0.9134    | t=2.746 df=3  | 0.071                | No                        |
| rlmN +       | 0.2313  | 0.3535         | 0.1767             | 0.2313      | 0.2313      | -0.3311 to 0.7937     | t=1.309 df=3  | 0.2818               | No                        |
| rluA         | 0.5111  | 0.3028         | 0.1514             | 0.5111      | 0.5111      | 0.0292 to 0.9929      | t=3.375 df=3  | 0.0432               | Yes                       |
| rluA +       | 0.4956  | 0.2493         | 0.1246             | 0.4956      | 0.4956      | 0.09891 to 0.8922     | t=3.976 df=3  | 0.0285               | Yes                       |
| selD         | 0.3499  | 0.2883         | 0.1442             | 0.3499      | 0.3499      | -0.1089 to 0.8087     | t=2.427 df=3  | 0.0936               | No                        |
| selD +       | 0.2951  | 0.2266         | 0.1133             | 0.2951      | 0.2951      | -0.0655 to 0.6558     | t=2.604 df=3  | 0.0801               | No                        |
| tcdA         | -0.9499 | 1.73           | 0.7063             | -0.9499     | -0.9499     | -2.766 to 0.8657      | t=1.345 df=5  | 0.2364               | No                        |
| tcdA +       | -0.2518 | 0.5033         | 0.2055             | -0.2518     | -0.2518     | -0.78 to 0.2764       | t=1.225 df=5  | 0.275                | No                        |
| tgt          | 0.2598  | 0.7691         | 0.3846             | 0.2598      | 0.2598      | -0.964 to 1.484       | t=0.6756 df=3 | 0.5477               | No                        |
| tgt +        | 0.06248 | 0.3862         | 0.1931             | 0.06248     | 0.06248     | -0.552 to 0.677       | t=0.3236 df=3 | 0.7675               | No                        |
| thiI         | -0.2298 | 0.1638         | 0.08189            | -0.2298     | -0.2298     | -0.4904 to 0.03076    | t=2.807 df=3  | 0.0675               | No                        |
| thiI +       | 0.3367  | 0.5895         | 0.2948             | 0.3367      | 0.3367      | -0.6013 to 1.275      | t=1.142 df=3  | 0.3362               | No                        |
| tmcA         | 0.6546  | 0.04383        | 0.02531            | 0.6546      | 0.6546      | 0.5457 to 0.7635      | t=25.87 df=2  | 0.0015               | Yes                       |
| tmcA +       | 0.5745  | 0.02093        | 0.01208            | 0.5745      | 0.5745      | 0.5225 to 0.6265      | t=47.55 df=2  | 0.0004               | Yes                       |
| TOP10        | 1.241   | 0.009848       | 0.005686           | 1.241       | 1.241       | 1.216 to 1.265        | t=218.2 df=2  | <0.0001              | Yes                       |
| TOP10 +      | 1.18    | 0.01977        | 0.01142            | 1.18        | 1.18        | 1.131 to 1.229        | t=103.4 df=2  | <0.0001              | Yes                       |
| trmA         | 0.3005  | 0.0975         | 0.04875            | 0.3005      | 0.3005      | 0.1454 to 0.4557      | t=6.165 df=3  | 0.0086               | Yes                       |
| trmA +       | 0.5086  | 0.5625         | 0.2812             | 0.5086      | 0.5086      | -0.3864 to 1.404      | t=1.808 df=3  | 0.1683               | No                        |
| trmB         | -0.1125 | 0.5475         | 0.2738             | -0.1125     | -0.1125     | -0.9838 to 0.7587     | t=0.411 df=3  | 0.7087               | No                        |
| trmB +       | -0.1175 | 0.6008         | 0.3004             | -0.1175     | -0.1175     | -1.073 to 0.8384      | t=0.3912 df=3 | 0.7218               | No                        |
| trmH         | 0.5643  | 0.2134         | 0.1067             | 0.5643      | 0.5643      | 0.2247 to 0.904       | t=5.288 df=3  | 0.0132               | Yes                       |
| trmH +       | 0.4695  | 0.07603        | 0.03802            | 0.4695      | 0.4695      | 0.3485 to 0.5904      | t=12.35 df=3  | 0.0011               | Yes                       |
| trmJ         | -0.6247 | 0.4524         | 0.2262             | -0.6247     | -0.6247     | -1.345 to 0.09519     | t=2.762 df=3  | 0.0701               | No                        |
| trmJ +       | -0.6937 | 0.4639         | 0.2319             | -0.6937     | -0.6937     | -1.432 to 0.04449     | t=2.991 df=3  | 0.0581               | No                        |
| trmL         | 0.5893  | 0.04341        | 0.0217             | 0.5893      | 0.5893      | 0.5203 to 0.6584      | t=27.15 df=3  | 0.0001               | Yes                       |
| trmL +       | 0.6431  | 0.07241        | 0.03621            | 0.6431      | 0.6431      | 0.5279 to 0.7583      | t=17.76 df=3  | 0.0004               | Yes                       |
| trmM         | 0.3675  | 0.2686         | 0.1343             | 0.3675      | 0.3675      | -0.05989 to 0.7949    | t=2.737 df=3  | 0.0715               | No                        |
| trmM +       | 0.3262  | 0.2504         | 0.1252             | 0.3262      | 0.3262      | -0.07226 to 0.7247    | t=2.605 df=3  | 0.08                 | No                        |
| trmO         | 0.4556  | 0.3113         | 0.1557             | 0.4556      | 0.4556      | -0.03981 to 0.9509    | t=2.927 df=3  | 0.0612               | No                        |
| trmO +       | 0.3205  | 0.2749         | 0.1374             | 0.3205      | 0.3205      | -0.1168 to 0.7579     | t=2.332 df=3  | 0.1019               | No                        |
| truA         | 2.304   | 0.251          | 0.1255             | 2.304       | 2.304       | 1.905 to 2.703        | t=18.36 df=3  | 0.0004               | Yes                       |
| truA +       | 1.912   | 0.09473        | 0.04736            | 1.912       | 1.912       | 1.762 to 2.063        | t=40.38 df=3  | <0.0001              | Yes                       |
| truB         | -0.1864 | 0.1698         | 0.0849             | -0.1864     | -0.1864     | -0.4566 to 0.08379    | t=2.196 df=3  | 0.1157               | No                        |
| truB +       | -0.2649 | 0.1201         | 0.06006            | -0.2649     | -0.2649     | -0.456 to -0.07374    | t=4.41 df=3   | 0.0216               | Yes                       |

| Gene deleted | Mean     | Std. Deviation | Std. Error of Mean | Actual mean | Discrepancy | 95% CI of discrepancy | t, df         | P value (two tailed) | Significant (alpha=0.05)? |
|--------------|----------|----------------|--------------------|-------------|-------------|-----------------------|---------------|----------------------|---------------------------|
| truC         | 0.2865   | 0.04022        | 0.02011            | 0.2865      | 0.2865      | 0.2225 to 0.3505      | t=14.25 df=3  | 0.0007               | Yes                       |
| truC +       | 0.2881   | 0.09082        | 0.04541            | 0.2881      | 0.2881      | 0.1436 to 0.4326      | t=6.344 df=3  | 0.0079               | Yes                       |
| truD         | -0.09493 | 0.1901         | 0.09505            | -0.09493    | -0.09493    | -0.3974 to 0.2076     | t=0.9987 df=3 | 0.3915               | No                        |
| truD +       | -0.05004 | 0.1037         | 0.05186            | -0.05004    | -0.05004    | -0.2151 to 0.115      | t=0.9651 df=3 | 0.4057               | No                        |
| ttcA         | -0.2315  | 0.05636        | 0.03254            | -0.2315     | -0.2315     | -0.3715 to -0.09152   | t=7.115 df=2  | 0.0192               | Yes                       |
| ttcA +       | -0.1381  | 0.3297         | 0.1903             | -0.1381     | -0.1381     | -0.957 to 0.6809      | t=0.7253 df=2 | 0.5436               | No                        |
| tusA         | 0.692    | 0.07203        | 0.03601            | 0.692       | 0.692       | 0.5774 to 0.8066      | t=19.21 df=3  | 0.0003               | Yes                       |
| tusA +       | 0.9288   | 0.2984         | 0.1492             | 0.9288      | 0.9288      | 0.4541 to 1.404       | t=6.226 df=3  | 0.0084               | Yes                       |
| tusB         | 0.7939   | 0.1534         | 0.07668            | 0.7939      | 0.7939      | 0.5499 to 1.038       | t=10.35 df=3  | 0.0019               | Yes                       |
| tusB +       | 0.858    | 0.2492         | 0.1246             | 0.858       | 0.858       | 0.4614 to 1.255       | t=6.884 df=3  | 0.0063               | Yes                       |
| tusC         | 0.3857   | 0.3307         | 0.1653             | 0.3857      | 0.3857      | -0.1405 to 0.9119     | t=2.333 df=3  | 0.1019               | No                        |
| tusC +       | 0.239    | 0.2618         | 0.1309             | 0.239       | 0.239       | -0.1776 to 0.6556     | t=1.826 df=3  | 0.1654               | No                        |
| tusD         | 0.8727   | 0.02977        | 0.01719            | 0.8727      | 0.8727      | 0.7987 to 0.9466      | t=50.77 df=2  | 0.0004               | Yes                       |
| tusD +       | 0.7785   | 0.03836        | 0.02215            | 0.7785      | 0.7785      | 0.6832 to 0.8738      | t=35.15 df=2  | 0.0008               | Yes                       |
| tusE         | -0.7681  | 0.04562        | 0.02281            | -0.7681     | -0.7681     | -0.8407 to -0.6955    | t=33.67 df=3  | <0.0001              | Yes                       |
| tusE +       | -0.8365  | 0.1193         | 0.05967            | -0.8365     | -0.8365     | -1.026 to -0.6466     | t=14.02 df=3  | 0.0008               | Yes                       |

**Supplementary Table S5.** Statistical analysis of the fluorescence measurements obtained for the wild type sfGFP synthesis in the selected Keio deletion strains in presence of Sep-OTS. The fluorescence measurements were calculated as a log<sub>2</sub> fold change relative to the BW25113 strain. The results of the Student's t-test are shown. Theoretical mean value is 0. Supplementation with 5 mM Sep is indicated by "+".

| Gene deleted | Mean     | Std. Deviation | Std. Error of Mean | Actual mean | Discrepancy | 95% CI of discrepancy | t, df         | P value (two tailed) | Significant (alpha=0.05)? |
|--------------|----------|----------------|--------------------|-------------|-------------|-----------------------|---------------|----------------------|---------------------------|
| CmoA         | -0.03225 | 0.005784       | 0.00409            | -0.03225    | -0.03225    | -0.08422 to 0.01972   | t=7.885 df=1  | 0.0803               | No                        |
| CmoA+Sep     | 0.02755  | 0.002376       | 0.00168            | 0.02755     | 0.02755     | 0.006207 to 0.0489    | t=16.4 df=1   | 0.0388               | Yes                       |
| CmoB         | 0.01941  | 0.04072        | 0.02879            | 0.01941     | 0.01941     | -0.3464 to 0.3852     | t=0.6742 df=1 | 0.6224               | No                        |
| CmoB+Sep     | 0.1157   | 0.05793        | 0.04096            | 0.1157      | 0.1157      | -0.4048 to 0.6362     | t=2.824 df=1  | 0.2167               | No                        |
| DusA         | -0.07001 | 0.04225        | 0.02988            | -0.07001    | -0.07001    | -0.4496 to 0.3096     | t=2.343 df=1  | 0.2568               | No                        |
| DusA+Sep     | 0.1366   | 0.1367         | 0.09664            | 0.1366      | 0.1366      | -1.091 to 1.364       | t=1.413 df=1  | 0.392                | No                        |
| DusB         | -0.2868  | 0.03661        | 0.02589            | -0.2868     | -0.2868     | -0.6157 to 0.04206    | t=11.08 df=1  | 0.0573               | No                        |
| DusB+Sep     | -0.3054  | 0.08038        | 0.05684            | -0.3054     | -0.3054     | -1.028 to 0.4168      | t=5.374 df=1  | 0.1171               | No                        |
| DusC         | -0.1306  | 0.08521        | 0.06025            | -0.1306     | -0.1306     | -0.8961 to 0.635      | t=2.167 df=1  | 0.2753               | No                        |
| DusC+Sep     | -0.04587 | 0.01509        | 0.01067            | -0.04587    | -0.04587    | -0.1814 to 0.08971    | t=4.299 df=1  | 0.1455               | No                        |
| GluQRS       | -0.05919 | 0.1785         | 0.1262             | -0.05919    | -0.05919    | -1.663 to 1.545       | t=0.4689 df=1 | 0.7209               | No                        |
| GluQRS+Sep   | -0.05466 | 0.1717         | 0.1214             | -0.05466    | -0.05466    | -1.597 to 1.488       | t=0.4502 df=1 | 0.7307               | No                        |
| IscA         | -0.01573 | 0.00787        | 0.005565           | -0.01573    | -0.01573    | -0.08644 to 0.05499   | t=2.826 df=1  | 0.2165               | No                        |
| IscA+Sep     | 0.04171  | 0.0268         | 0.01895            | 0.04171     | 0.04171     | -0.1991 to 0.2825     | t=2.201 df=1  | 0.2715               | No                        |
| MiaA         | 0.123    | 0.1643         | 0.1162             | 0.123       | 0.123       | -1.353 to 1.599       | t=1.059 df=1  | 0.4818               | No                        |
| MiaA+Sep     | 0.2757   | 0.002455       | 0.001736           | 0.2757      | 0.2757      | 0.2536 to 0.2977      | t=158.8 df=1  | 0.004                | Yes                       |
| MiaB         | -0.6134  | 0.002878       | 0.002035           | -0.6134     | -0.6134     | -0.6393 to -0.5876    | t=301.4 df=1  | 0.0021               | Yes                       |

| Gene deleted | Mean     | Std. Deviation | Std. Error of Mean | Actual mean | Discrepancy | 95% CI of discrepancy | t, df          | P value (two tailed) | Significant (alpha=0.05) ? |
|--------------|----------|----------------|--------------------|-------------|-------------|-----------------------|----------------|----------------------|----------------------------|
| MiaB+Sep     | -0.4675  | 0.05858        | 0.04143            | -0.4675     | -0.4675     | -0.9938 to 0.05889    | t=11.28 df=1   | 0.0563               | No                         |
| MnmA         | -0.01481 | 0.01512        | 0.01069            | -0.01481    | -0.01481    | -0.1506 to 0.121      | t=1.385 df=1   | 0.398                | No                         |
| MnmA+Sep     | 0.09416  | 0.06264        | 0.04429            | 0.09416     | 0.09416     | -0.4686 to 0.6569     | t=2.126 df=1   | 0.2799               | No                         |
| MnmCD        | -0.4076  | 0.08048        | 0.05691            | -0.4076     | -0.4076     | -1.131 to 0.3155      | t=7.162 df=1   | 0.0883               | No                         |
| MnmCD+Sep    | -0.3945  | 0.000743       | 0.000525           | -0.3945     | -0.3945     | -0.4012 to -0.3879    | t=751.5 df=1   | 0.0008               | Yes                        |
| MnmE         | -0.3455  | 0.01546        | 0.008928           | -0.3455     | -0.3455     | -0.3839 to -0.3071    | t=38.7 df=2    | 0.0007               | Yes                        |
| MnmE+Sep     | -0.5877  | 0.02386        | 0.01687            | -0.5877     | -0.5877     | -0.8021 to -0.3733    | t=34.84 df=1   | 0.0183               | Yes                        |
| MnmH         | 0.04349  | 0.1469         | 0.1039             | 0.04349     | 0.04349     | -1.277 to 1.364       | t=0.4186 df=1  | 0.7476               | No                         |
| MnmH+Sep     | 0.2796   | 0.006213       | 0.004393           | 0.2796      | 0.2796      | 0.2238 to 0.3354      | t=63.65 df=1   | 0.01                 | Yes                        |
| QueA         | -0.1117  | 0.04272        | 0.03021            | -0.1117     | -0.1117     | -0.4955 to 0.2721     | t=3.699 df=1   | 0.1681               | No                         |
| QueA+Sep     | -0.1301  | 0.02525        | 0.01786            | -0.1301     | -0.1301     | -0.3569 to 0.09681    | t=7.284 df=1   | 0.0869               | No                         |
| QueF         | 0.0614   | 0.164          | 0.1159             | 0.0614      | 0.0614      | -1.412 to 1.535       | t=0.5296 df=1  | 0.6899               | No                         |
| QueF+Sep     | 0.03325  | 0.1822         | 0.1288             | 0.03325     | 0.03325     | -1.603 to 1.67        | t=0.2582 df=1  | 0.8392               | No                         |
| QueG         | 0.01521  | 0.1641         | 0.116              | 0.01521     | 0.01521     | -1.459 to 1.49        | t=0.1311 df=1  | 0.917                | No                         |
| QueG+Sep     | -0.00789 | 0.08583        | 0.06069            | -0.00789    | -0.00789    | -0.779 to 0.7632      | t=0.13 df=1    | 0.9177               | No                         |
| RlmN         | 0.004665 | 0.01914        | 0.01353            | 0.004665    | 0.004665    | -0.1673 to 0.1766     | t=0.3446 df=1  | 0.7887               | No                         |
| RlmN+Sep     | 0.1499   | 0.01796        | 0.0127             | 0.1499      | 0.1499      | -0.01147 to 0.3113    | t=11.8 df=1    | 0.0538               | No                         |
| RluA         | -0.4601  | 0.02504        | 0.01771            | -0.4601     | -0.4601     | -0.6851 to -0.2352    | t=25.99 df=1   | 0.0245               | Yes                        |
| RluA+Sep     | -0.1594  | 0.2086         | 0.1043             | -0.1594     | -0.1594     | -0.4914 to 0.1725     | t=1.529 df=3   | 0.2238               | No                         |
| SelD         | -0.1485  | 0.001089       | 0.00077            | -0.1485     | -0.1485     | -0.1583 to -0.1387    | t=192.9 df=1   | 0.0033               | Yes                        |
| SelD+Sep     | -0.08434 | 0.04494        | 0.03178            | -0.08434    | -0.08434    | -0.4881 to 0.3195     | t=2.654 df=1   | 0.2294               | No                         |
| TcdA         | -0.4478  | 0.006392       | 0.00452            | -0.4478     | -0.4478     | -0.5053 to -0.3904    | t=99.08 df=1   | 0.0064               | Yes                        |
| TcdA+Sep     | -0.3353  | 0.01882        | 0.01331            | -0.3353     | -0.3353     | -0.5044 to -0.1662    | t=25.19 df=1   | 0.0253               | Yes                        |
| TGT          | -0.1667  | 0.03516        | 0.02487            | -0.1667     | -0.1667     | -0.4827 to 0.1492     | t=6.705 df=1   | 0.0942               | No                         |
| TGT+Sep      | -0.2674  | 0.004964       | 0.00351            | -0.2674     | -0.2674     | -0.312 to -0.2228     | t=76.18 df=1   | 0.0084               | Yes                        |
| ThiI         | -0.1453  | 0.02666        | 0.01885            | -0.1453     | -0.1453     | -0.3848 to 0.09421    | t=7.708 df=1   | 0.0821               | No                         |
| ThiI+Sep     | -0.07967 | 0.02105        | 0.01489            | -0.07967    | -0.07967    | -0.2688 to 0.1095     | t=5.352 df=1   | 0.1176               | No                         |
| Tmca         | -0.0804  | 0.01222        | 0.00864            | -0.0804     | -0.0804     | -0.1902 to 0.02938    | t=9.306 df=1   | 0.0682               | No                         |
| Tmca+Sep     | 0.02813  | 0.03782        | 0.02675            | 0.02813     | 0.02813     | -0.3117 to 0.368      | t=1.052 df=1   | 0.4839               | No                         |
| TOP10        | -0.248   | 0.01224        | 0.006119           | -0.248      | -0.248      | -0.2675 to -0.2285    | t=40.53 df=3   | <0.0001              | Yes                        |
| TOP10+Sep    | -0.2041  | 0.02981        | 0.01491            | -0.2041     | -0.2041     | -0.2515 to -0.1566    | t=13.69 df=3   | 0.0008               | Yes                        |
| TrmB         | -0.04462 | 0.05638        | 0.03987            | -0.04462    | -0.04462    | -0.5512 to 0.462      | t=1.119 df=1   | 0.4642               | No                         |
| TrmB+Sep     | -0.02259 | 0.02017        | 0.01427            | -0.02259    | -0.02259    | -0.2038 to 0.1587     | t=1.583 df=1   | 0.3586               | No                         |
| TrmH         | -0.01267 | 0.2396         | 0.1694             | -0.01267    | -0.01267    | -2.165 to 2.14        | t=0.07479 df=1 | 0.9525               | No                         |
| TrmH+Sep     | -0.01482 | 0.02867        | 0.02027            | -0.01482    | -0.01482    | -0.2724 to 0.2428     | t=0.7309 df=1  | 0.5982               | No                         |
| TrmJ         | -0.1095  | 0.1995         | 0.1411             | -0.1095     | -0.1095     | -1.902 to 1.683       | t=0.7759 df=1  | 0.5799               | No                         |
| TrmJ+Sep     | -0.1026  | 0.03742        | 0.02646            | -0.1026     | -0.1026     | -0.4388 to 0.2336     | t=3.878 df=1   | 0.1607               | No                         |
| TrmL         | -0.1421  | 0.2854         | 0.2018             | -0.1421     | -0.1421     | -2.706 to 2.422       | t=0.7043 df=1  | 0.6094               | No                         |
| TrmL+Sep     | -0.07548 | 0.2376         | 0.168              | -0.07548    | -0.07548    | -2.211 to 2.06        | t=0.4492 df=1  | 0.7312               | No                         |
| TrmM         | -0.09532 | 0.02042        | 0.01444            | -0.09532    | -0.09532    | -0.2788 to 0.08816    | t=6.601 df=1   | 0.0957               | No                         |
| TrmM+Sep     | -0.0052  | 0.03484        | 0.02463            | -0.0052     | -0.0052     | -0.3182 to 0.3078     | t=0.211 df=1   | 0.8676               | No                         |

| Gene deleted | Mean     | Std. Deviation | Std. Error of Mean | Actual mean | Discrepancy | 95% CI of discrepancy | t, df         | P value (two tailed) | Significant (alpha=0.05) ? |
|--------------|----------|----------------|--------------------|-------------|-------------|-----------------------|---------------|----------------------|----------------------------|
| TrmO         | -0.1219  | 0.02289        | 0.01619            | -0.1219     | -0.1219     | -0.3276 to 0.0837     | t=7.534 df=1  | 0.084                | No                         |
| TrmO+Sep     | -0.02313 | 0.02652        | 0.01875            | -0.02313    | -0.02313    | -0.2614 to 0.2151     | t=1.234 df=1  | 0.4337               | No                         |
| TruA         | 0.2209   | 0.009734       | 0.006883           | 0.2209      | 0.2209      | 0.1335 to 0.3084      | t=32.1 df=1   | 0.0198               | Yes                        |
| TruA+Sep     | 0.1364   | 0.06268        | 0.04432            | 0.1364      | 0.1364      | -0.4267 to 0.6996     | t=3.078 df=1  | 0.2                  | No                         |
| TruB         | -0.2392  | 0.03931        | 0.0278             | -0.2392     | -0.2392     | -0.5923 to 0.114      | t=8.605 df=1  | 0.0737               | No                         |
| TruB+Sep     | -0.1366  | 0.02193        | 0.01551            | -0.1366     | -0.1366     | -0.3336 to 0.06038    | t=8.812 df=1  | 0.0719               | No                         |
| TruC         | -0.07562 | 0.02865        | 0.02026            | -0.07562    | -0.07562    | -0.333 to 0.1818      | t=3.732 df=1  | 0.1666               | No                         |
| TruC+Sep     | 0.02293  | 0.001341       | 0.000949           | 0.02293     | 0.02293     | 0.01088 to 0.03498    | t=24.18 df=1  | 0.0263               | Yes                        |
| TruD         | -0.05717 | 0.007729       | 0.005465           | -0.05717    | -0.05717    | -0.1266 to 0.01227    | t=10.46 df=1  | 0.0607               | No                         |
| TruD+Sep     | 0.02265  | 0.04479        | 0.03167            | 0.02265     | 0.02265     | -0.3798 to 0.4251     | t=0.7152 df=1 | 0.6047               | No                         |
| TtcA         | -0.4377  | 0.004059       | 0.00287            | -0.4377     | -0.4377     | -0.4742 to -0.4013    | t=152.5 df=1  | 0.0042               | Yes                        |
| TtcA+Sep     | -0.4615  | 0.01819        | 0.01286            | -0.4615     | -0.4615     | -0.6249 to -0.2981    | t=35.89 df=1  | 0.0177               | Yes                        |
| TusA         | -0.1359  | 0.03326        | 0.02352            | -0.1359     | -0.1359     | -0.4348 to 0.1629     | t=5.778 df=1  | 0.1091               | No                         |
| TusA+Sep     | 0.1893   | 0.02198        | 0.01554            | 0.1893      | 0.1893      | -0.008112 to 0.3868   | t=12.18 df=1  | 0.0521               | No                         |
| TusB         | 0.01747  | 0.03315        | 0.02344            | 0.01747     | 0.01747     | -0.2804 to 0.3153     | t=0.7453 df=1 | 0.5922               | No                         |
| TusB+Sep     | 0.1687   | 0.05544        | 0.0392             | 0.1687      | 0.1687      | -0.3294 to 0.6668     | t=4.303 df=1  | 0.1454               | No                         |
| TusC         | -0.09136 | 0.03504        | 0.02478            | -0.09136    | -0.09136    | -0.4062 to 0.2234     | t=3.687 df=1  | 0.1686               | No                         |
| TusC+Sep     | 0.04732  | 0.01534        | 0.01085            | 0.04732     | 0.04732     | -0.09052 to 0.1852    | t=4.362 df=1  | 0.1435               | No                         |
| TusE         | -0.07592 | 0.0249         | 0.01437            | -0.07592    | -0.07592    | -0.1378 to -0.01408   | t=5.282 df=2  | 0.034                | Yes                        |
| TusE+Sep     | -0.07581 | 0.07636        | 0.04409            | -0.07581    | -0.07581    | -0.2655 to 0.1139     | t=1.72 df=2   | 0.2276               | No                         |

### Supplementary references

1. Boccaletto, P.; Machnicka, M.A.; Purta, E.; Piatkowski, P.; Baginski, B.; Wirecki, T.K.; de Crecy-Lagard, V.; Ross, R.; Limbach, P.A.; Kotter, A., *et al.* MODOMICS: a database of RNA modification pathways. 2017 update. *Nucleic Acids Res* **2018**, *46*, D303-D307.
